# Supplementary material
Source: PubMed Central journal article supplement (PMC2262918)

# Supplementary Figure 1

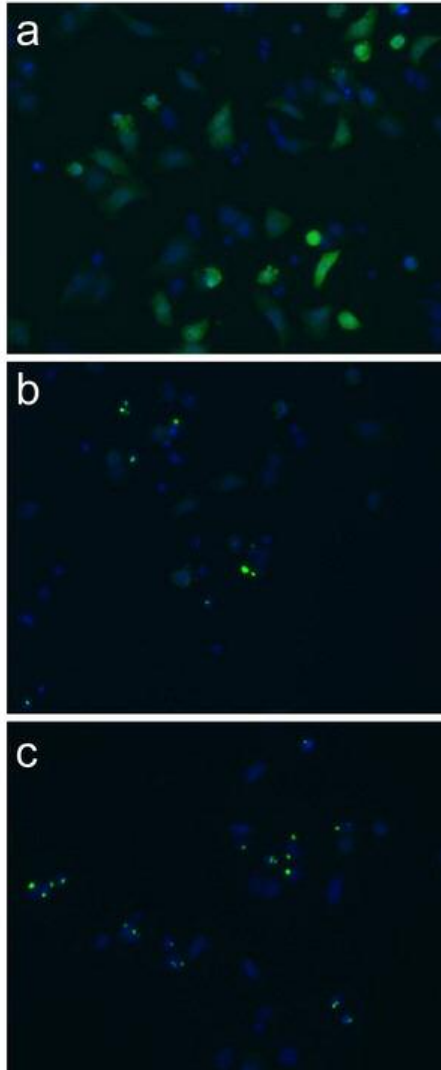

Supplement: 109_2007_251_MOESM1_ESM.pdf [file 109_2007_251_MOESM1_ESM.pdf]
